# Supplementary material
Source: PubMed Central journal article supplement (PMC4114341)
Supplement: NIHMS593944-supplement-01.pdf [file NIHMS593944-supplement-01.pdf]

**Supplementary Table 1.** Spearman correlation coefficients between insulin resistance, visceral adiposity and CMR indices of ventricular structure and function. Spearman correlation coefficients are shown for the overall population and stratified by presence or absence of obesity. \*\*\*<.0001; \*\*= <.01; \*= <.05. Abbreviations: LV = left ventricular; HOMA-IR = homeostatic model assessment of insulin resistance; BMI = body mass index; WHR = waist-to-hip ratio.

| Remodeling                        | Overall population |         |        |         | BMI < 30 kg/m <sup>2</sup> |         |         | BMI ≥ 30 kg/m <sup>2</sup> |         |        |
|-----------------------------------|--------------------|---------|--------|---------|----------------------------|---------|---------|----------------------------|---------|--------|
|                                   | Fasting glucose    | HOMA-IR | BMI    | WHR     | Fasting glucose            | HOMA-IR | WHR     | Fasting glucose            | HOMA-IR | WHR    |
| Ventricular remodeling (N=4364)   |                    |         |        |         |                            |         |         |                            |         |        |
| LV ejection fraction              | -.01               | .001    | -.04** | -.08*** | .006                       | .02     | -.07*** | -.06*                      | -.04    | -.09** |
| LV end-diastolic volume index     | -.09***            | -.14*** | -.02   | -.05**  | -.09***                    | -.14*** | -.05**  | -.06                       | -.13*** | -.01   |
| LV end-systolic volume index      | -.05**             | -.09*** | .02    | .02     | -.06**                     | -.10*** | .02     | .007                       | -.04    | .05    |
| LV mass index                     | .11***             | .05**   | .14*** | .24***  | .09***                     | .01     | .21***  | .13***                     | .09**   | .29*** |
| LV mass to volume ratio           | .20***             | .20***  | .16*** | .29***  | .19***                     | .17***  | .28***  | .19***                     | .21***  | .30*** |
| Regional function (mid-LV)        |                    |         |        |         |                            |         |         |                            |         |        |
| Systolic wall shortening (N=4215) | .06**              | .04*    | .02    | .09***  | .05*                       | .02     | .08***  | .09**                      | .08**   | .14*** |
| Peak systolic strain (N=880)      | .10**              | .14***  | .15*** | .15***  | .08*                       | .12**   | .15**   | .11                        | .10     | .07    |

**Supplementary Table 2.** Spearman correlation coefficients between markers of systemic inflammation and markers of insulin resistance, visceral adiposity and body mass index. \*\*\*<.0001; \*\* = <.01; \* = <.05. Biomarkers were log transformed. Abbreviations: BMI = body mass index; CRP = C-reactive protein; PAI-I = platelet activator inhibitor-1; IL-6 = interleukin-6; TNF = tumor necrosis factor; WHR = waist-to-hip ratio; HOMA-IR = homeostatic model assessment of insulin resistance. NA = not applicable.

| Variable                       | Overall population |         |         |                 |         | BMI < 30 kg/m <sup>2</sup> |         |         |                 | BMI ≥ 30 kg/m <sup>2</sup> |         |         |                 |
|--------------------------------|--------------------|---------|---------|-----------------|---------|----------------------------|---------|---------|-----------------|----------------------------|---------|---------|-----------------|
|                                | LV M-V ratio       | HOMA-IR | WHR     | Fasting glucose | BMI     | LV M-V ratio               | HOMA-IR | WHR     | Fasting glucose | LV M-V ratio               | HOMA-IR | WHR     | Fasting glucose |
| <b>BMI</b>                     | 0.16***            | 0.53*** | 0.39*** | 0.24***         | NA      | 0.17***                    | 0.41*** | 0.38*** | 0.20***         | -0.02                      | 0.20*** | 0.02    | 0.10***         |
| <b>CRP</b>                     | 0.06***            | 0.25*** | 0.14*** | 0.09***         | 0.41*** | 0.08***                    | 0.15*** | 0.12*** | 0.05**          | -0.08**                    | 0.05*   | -0.07** | 0.03            |
| <b>PAI-1</b>                   | 0.18***            | 0.56*** | 0.33*** | 0.36***         | 0.39*** | 0.12**                     | 0.50*** | 0.24*** | 0.30***         | 0.19*                      | 0.44*** | 0.26*** | 0.38***         |
| <b>IL-6</b>                    | 0.13***            | 0.27*** | 0.23*** | 0.16***         | 0.36*** | 0.14***                    | 0.18*** | 0.21*** | 0.12***         | 0.03                       | 0.15*** | 0.06**  | 0.11***         |
| <b>Soluble TNFα receptor-1</b> | 0.17***            | 0.20*** | 0.24*** | 0.13***         | 0.22*** | 0.17***                    | 0.15*** | 0.24*** | 0.12***         | 0.09                       | 0.18*** | 0.11**  | 0.10**          |
